# Supplementary material
Source: PubMed Central journal article supplement (PMC3748620)
Supplement: NIHMS497140-supplement-02.pdf [file NIHMS497140-supplement-02.pdf]

**Supplemental Figure 1:**

Tree algorithm model for the final, seven code algorithm. A tree model was fitted using binary recursive partitioning based on ICD-9 and CTC codes. In this model “1”, the right-hand choice at each node, indicates the presence of the indicated code, whereas “0”, indicates the absence of the given code. The terminal nodes indicate the presence (“1”) or absence (“0”) of an inherited leukodystrophy. In this fashion each patient is progressively sorted after entering the tree algorithm at the root or initial node.
